# Supplementary material
Source: Springer Nature journal article supplement (https://www.springermedizin.de/resource/supplementary/12913_2014_3495_MOESM6_ESM.pdf/9532878)
Supplement: MOESM6 [file 9532878]

# Funnel Plot of Standard Error by Std diff in means

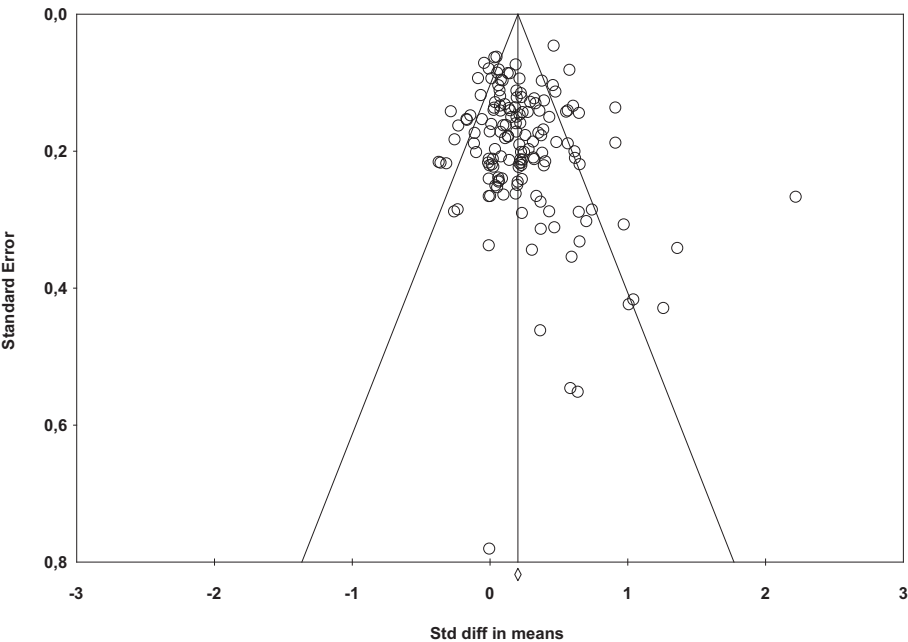

## Egger's regression intercept

|                            |           |
|----------------------------|-----------|
| Intercept                  | 0,47007   |
| Standard error             | 0,31876   |
| 95% lower limit (2-tailed) | -0,15984  |
| 95% upper limit (2-tailed) | 1,09998   |
| t-value                    | 1,47467   |
| df                         | 148,00000 |
| P-value (1-tailed)         | 0,07121   |
| P-value (2-tailed)         | 0,14242   |
